# Supplementary material
Source: publisher figshare collection journal article supplement (https://acs.figshare.com/ndownloader/files/4058554)

## Supporting Information

**Figure S1.** Structures of resveratrol (RES) and stevioside (STE).

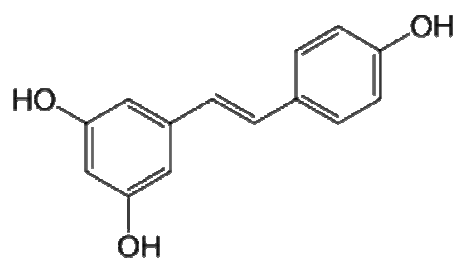

**Resveratrol**

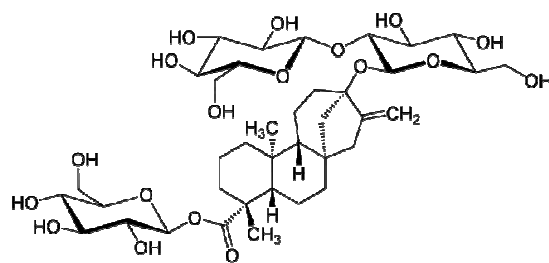

**Stevioside**

**Figure S2.** The plots of the pyrene fluorescence intensity ratio  $I_{373}/I_{385}$  as a function of STE concentrations. CMC: critical micelles concentration.

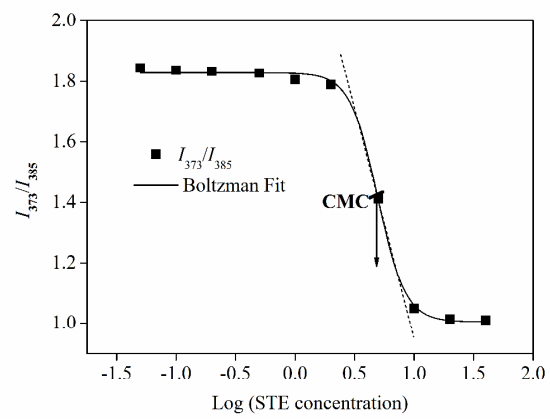

Supplement: Supplementary file 1 [file 4058554]
